# Supplementary material
Source: Research Square preprint supplement (doi:10.21203/rs.3.rs-9263640/v1)
Supplement: Supplementary file 1 [file f0c32684922f365d72a03a2d.docx]

# Appendix

## Rest Intolerance Scale (Short Form; Wang et al., 2024)

Instructions: Please rate how much you agree with each statement regarding your experiences during rest or leisure time. (1 = Strongly Disagree to 5 = Strongly Agree)

1. When resting or entertaining, I worry about being surpassed by others.

2. When resting, I often think about peers who are working harder than me.

3. I believe I should spend more time on study/work rather than rest.

4. I think I should use my rest time to do something more meaningful.

5. When resting or entertaining, I feel there are other things I should be doing.

6. When resting or entertaining, I feel guilty.

7. When resting or entertaining, I cannot help thinking about study or work.

8. When resting or entertaining, I feel bad about myself.

## Temporal Focus Scale (Future and Present Subscales; Shipp et al., 2009)

Instructions: Please indicate how frequently you engage in each of the following activities. (1 = Never to 7 = Always)

### Future Focus Subscale

1. I think about what my future will be like.

2. I focus on my future.

3. I think about what tomorrow will bring.

4. I think about times to come.

### Present Focus Subscale

1. I focus on what is currently happening.

2. I focus on the here and now.

3. I live my life in the present.

4. I take each day as it comes.
